# Supplementary material for: Study of Chlorella sorokiniana Cultivation in an Airlift Tubular Photobioreactor Using Anaerobic Digestate Substrate
Source: MDPI journal article supplement (doi:10.3390/w16030485), 2024-02-01
Supplement: s1 [file s1]

Archive with 1 entries (1 files):
- water-2807944-supplementary.pdf
