# Supplementary material for: Study of Chlorella sorokiniana Cultivation in an Airlift Tubular Photobioreactor Using Anaerobic Digestate Substrate
Source: MDPI journal article supplement (doi:10.3390/w16030485), 2024-02-01
Supplement: s1 [file s1 › water-2807944-supplementary.pdf]

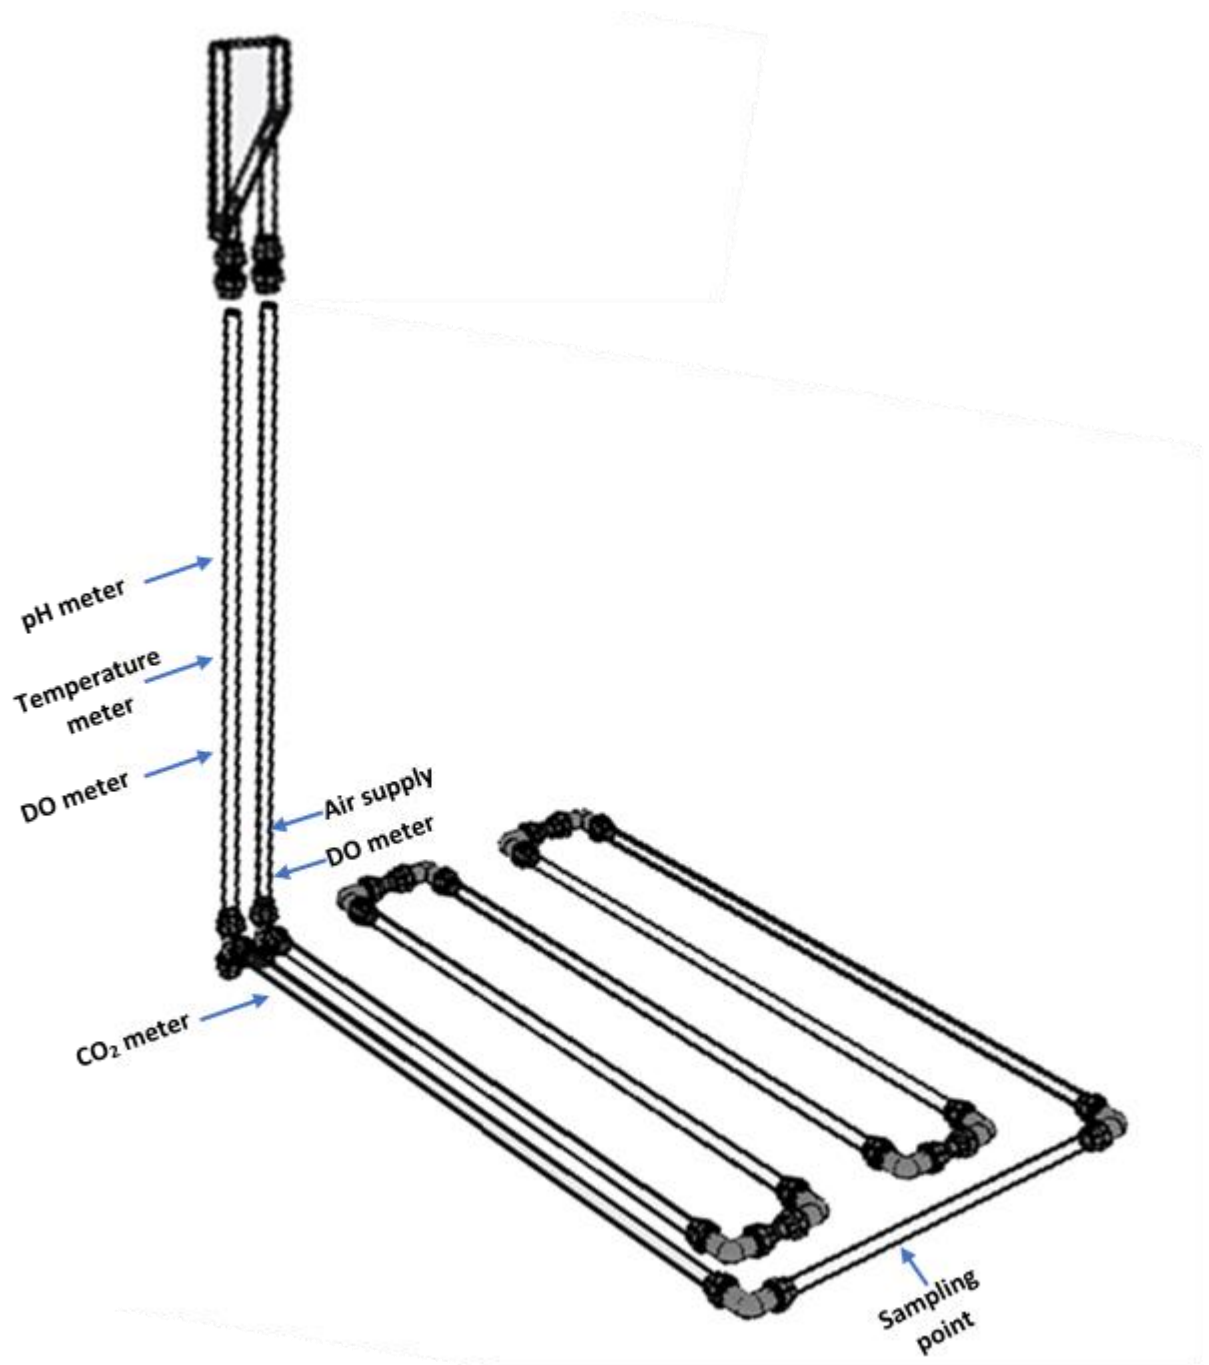

**Figure S1:** Conceptual diagram of the 20 L air-lift photobioreactor.

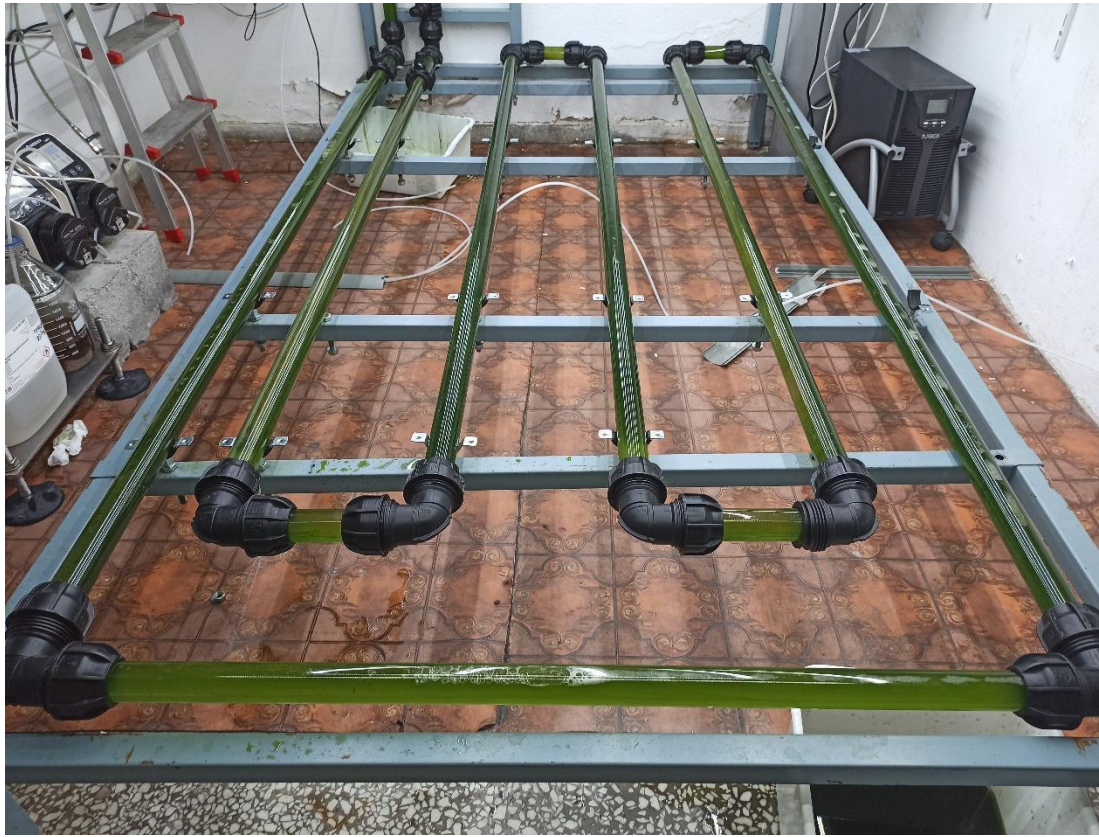

(a)

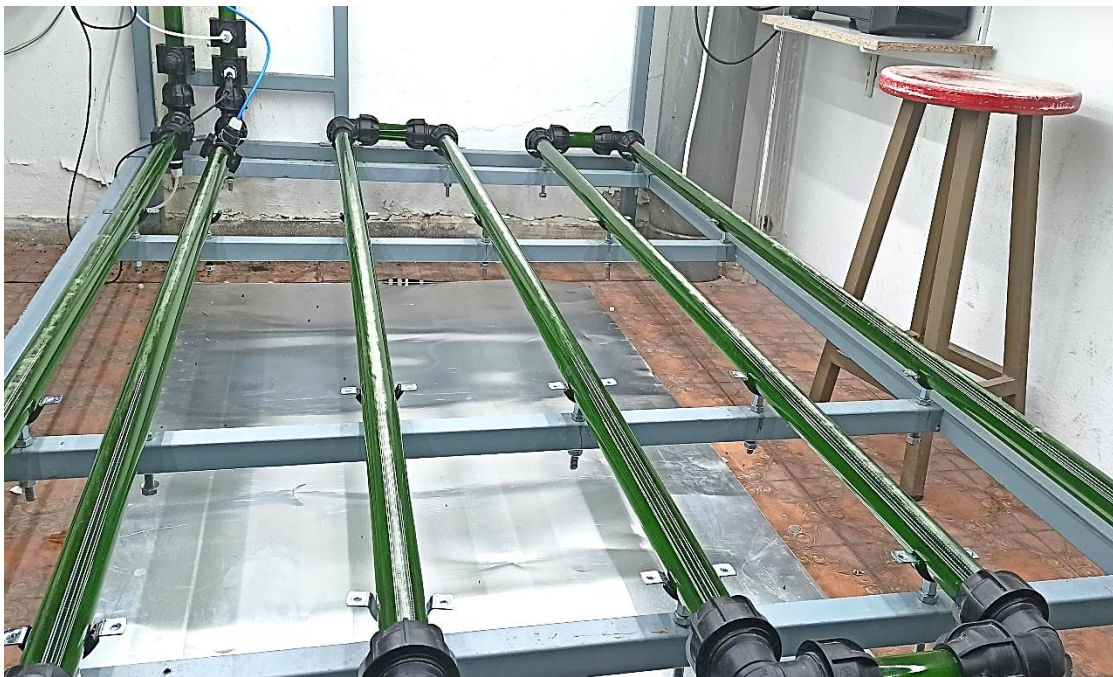

(b)

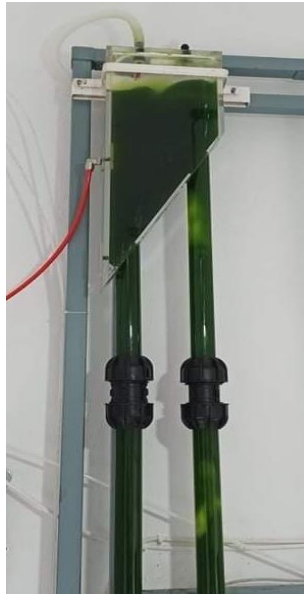

(c)

**Figure S2:** Airlift tubular photobioreactor: solar receiver part (a-b), degasser (c)

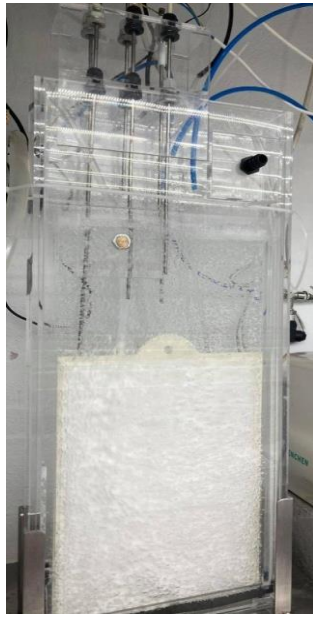

(a)

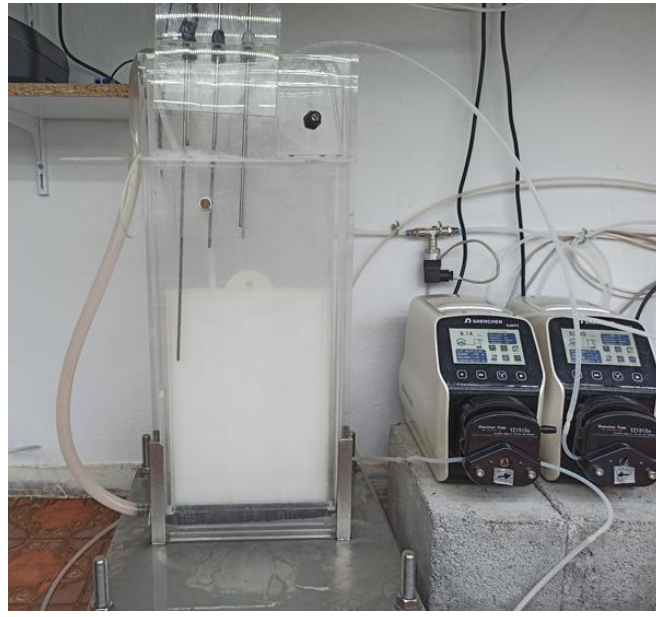

(b)

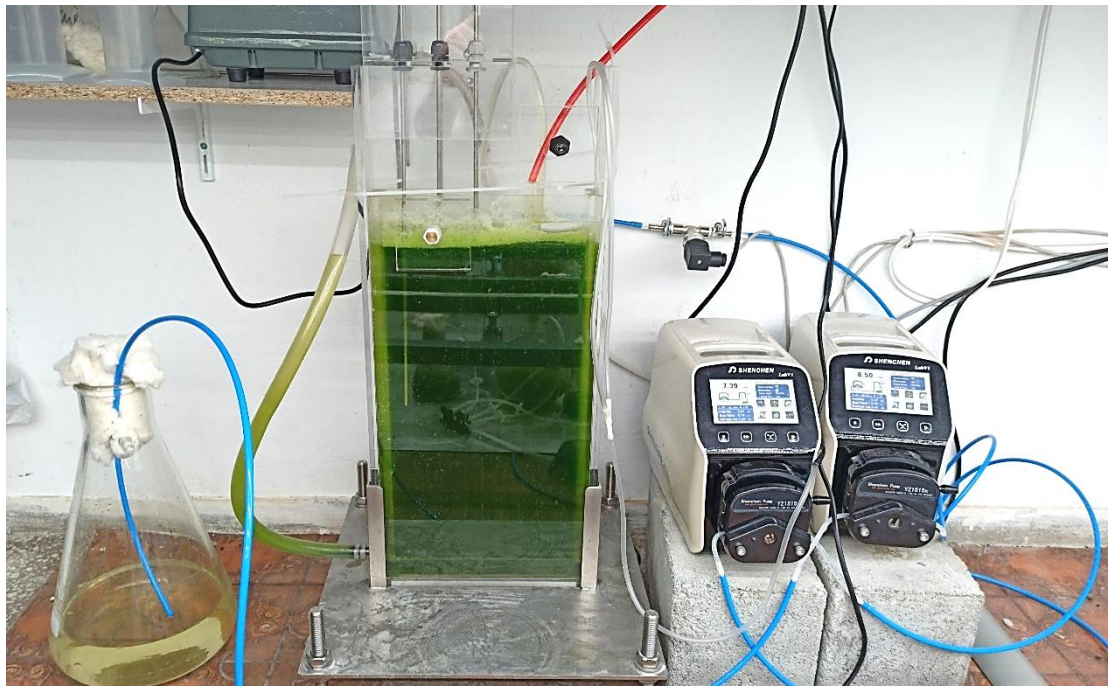

(c)

**Figure S3:** Ultrafiltration Membrane (UFM) System: (a) UFM vessel filled with sodium hypochlorite (NaClO) solution (b) UFM vessel – level sensors (inside the vessel)- inlet and harvesting peristaltic pumps (right) and (c) UFM vessel filled with microalgae culture during harvesting period.

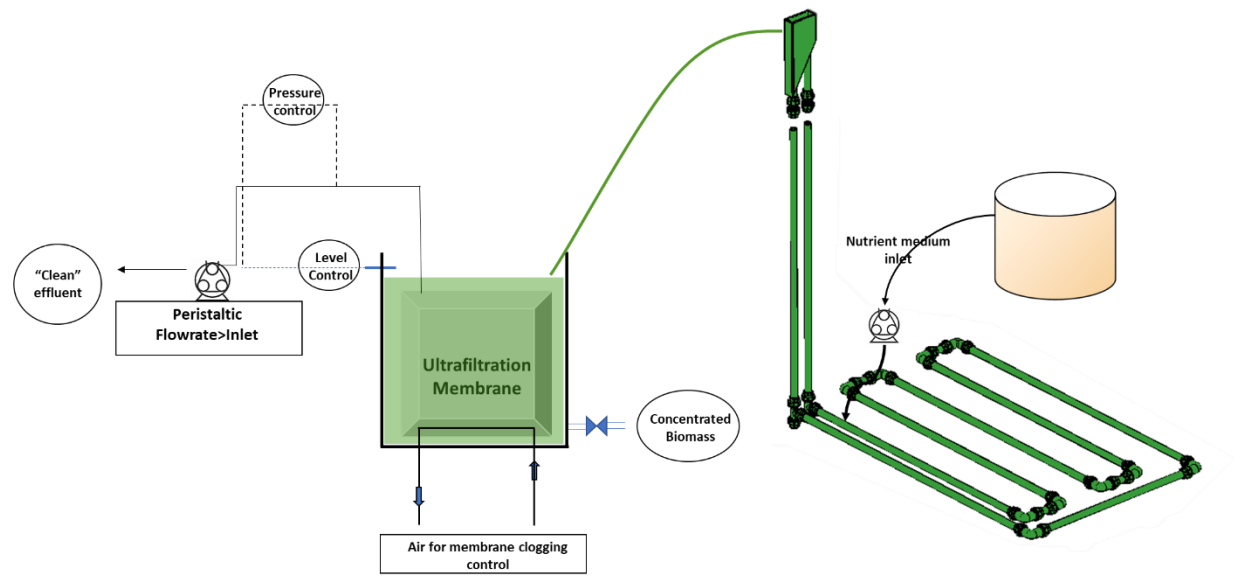

**Figure S4:** Schematic illustration of the ultrafiltration membrane system

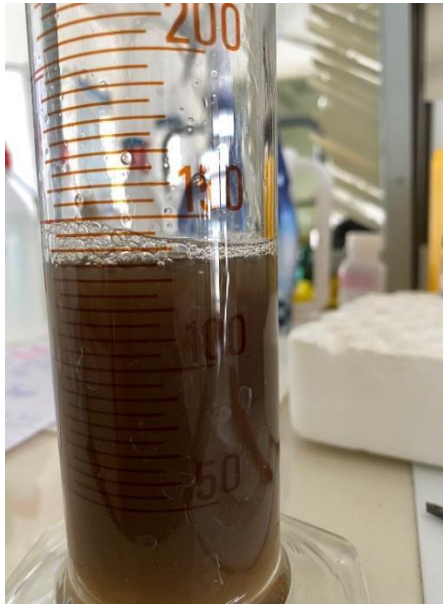

(a)

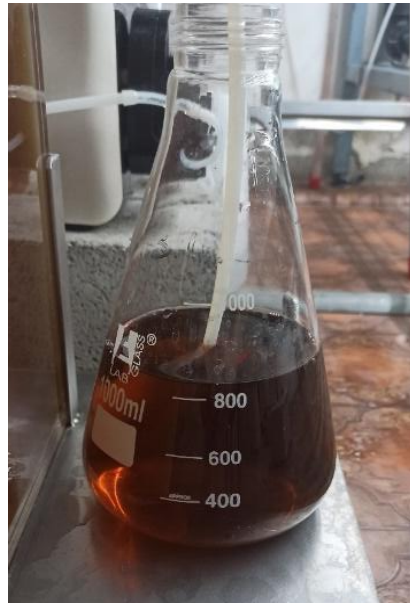

(b)

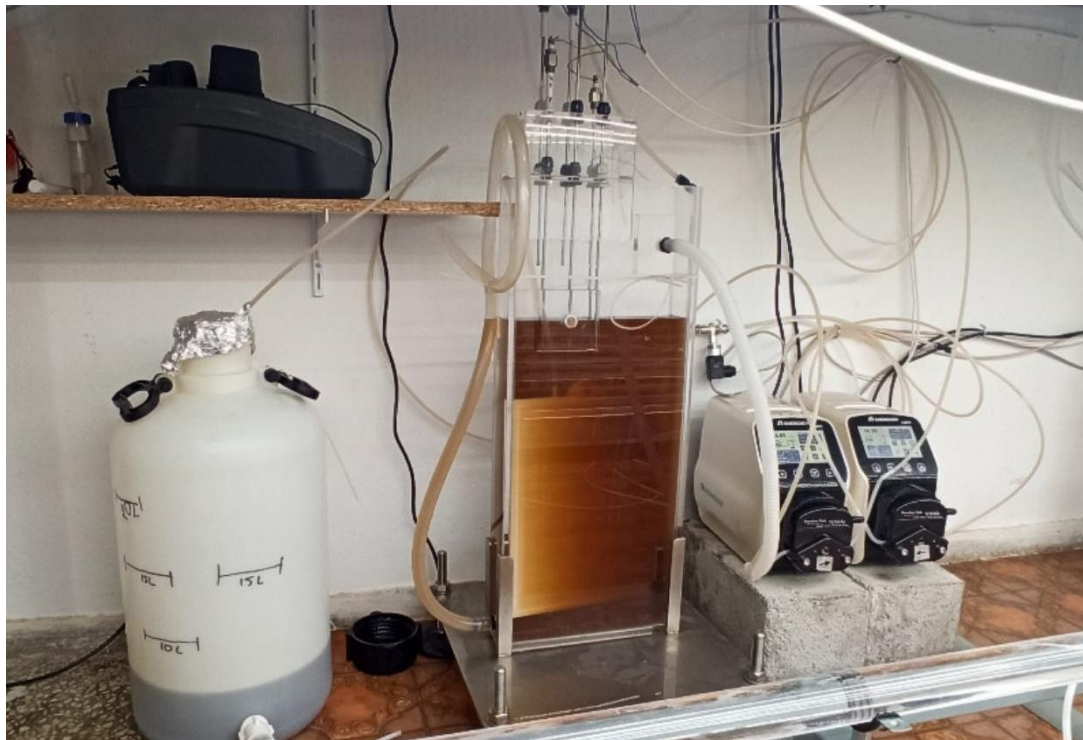

(c)

**Figure S5:** 10% ADE before (a), after ultra-filtration (b) and during filter-sterilization at UMF (c).
